# Supplementary material
Source: PubMed Central journal article supplement (PMC3370567)

Table A1. Alignment of the primer sites targeted by the niHF/niHR primer pair.

| Organism                 | Accession              | Forward priming site (5'-3')                             |            | Reverse priming site (5'-3') <sup>a</sup>       |            | Total mismatches | qPCR Efficiency |
|--------------------------|------------------------|----------------------------------------------------------|------------|-------------------------------------------------|------------|------------------|-----------------|
|                          |                        | primer niHF                                              | Mismatches | primer niHR                                     | Mismatches |                  |                 |
| <i>Frankia sp.</i>       | NC_008278 <sup>c</sup> | AAAGGYGGWA <b>T</b> CGGYAAR <b>TCCACCAC</b>              | 1          | ATGATGGCCSATGTATGCGCSAA <b>CAA</b> <sup>b</sup> | 0          | 1                | 1.73            |
| <i>Cyanotheca sp.</i>    | NC_011884              | AAAGGTTGGTATCGGCAAGTCCACCAC                              | 2          | ATGATGGCCATGTACGCTGCCAACAA                      | 1          | 3                | 1.76            |
| <i>N. commune</i>        | L23514 <sup>c</sup>    | AAAGCGGGAT <b>T</b> GGTAAATCCACCAC                       | 1          | ATGATGGCCATGTATGCGCTAACAA                       | 2          | 3                | 1.77            |
| <i>N. punctiforme</i>    | NC_010628              | AAAGCGGGTATCGGTAAAT <b>T</b> ACCAC                       | 2          | ATGATGGCCATGTATGCGCTAACAA                       | 2          | 4                | 1.76            |
| <i>Nostoc sp.</i>        | NC_003272              | AAAGCGGGTATCGGTAAAT <b>T</b> ACCAC                       | 1          | ATGATGGCCATGTATGCGCTAACAA                       | 2          | 3                | 1.77            |
| <i>P. sabiniae</i>       | HM583800               | AAAGGAGGAA <b>T</b> CGGCAAA <b>TCCACCAC</b>              | 0          | ATGATGGCCATGTACGCAAGCCAA <b>CAA</b>             | 1          | 1                | 1.76            |
| <i>A. brasilense</i>     | X51500 <sup>c</sup>    | AAAGGCGGTATCGGCAAGTCCACCAC                               | 1          | ATGATGGCC <b>T</b> CTACGCCGCCAACAA              | 1          | 2                | 1.77            |
| <i>B. japonicum</i>      | NC_004463              | AAAGGCGGAA <b>T</b> CGGCAAGTCCACCAC                      | 1          | ATGATGGCC <b>A</b> TATGTATGCCGCA <b>AA</b> CAA  | 2          | 3                | 1.76            |
| <i>M. trichosporium</i>  | NZ_ADVE01000002        | AAAGGCGGTAT <b>T</b> GGCAAGT <b>CGACGAC</b>              | 4          | ATGATGGCCATGTATGCCGGCA <b>CAA</b>               | 0          | 4                | n.d.            |
| <i>R. leguminosarum</i>  | NC_008381              | AAAGGCGG <b>C</b> AT <b>T</b> GGCAAGTCCACTAC             | 4          | ATGATGGCG <b>C</b> TCTATGCCGCCAACAA             | 1          | 5                | 1.75            |
| <i>S. meliloti</i>       | NC_003037              | AAAGGCGGTATCGGCAAGTCCACCAC                               | 3          | ATGATGGCG <b>C</b> TCTATGCCGCCAACAA             | 1          | 4                | 1.75            |
| <i>S. azotifigens</i>    | AB217474 <sup>c</sup>  | ~~~~TGGTAT <b>T</b> GGTAAAGT <b>GGACGAC</b> <sup>e</sup> | 4          | ATGATGGCCATGTATGCCGCCAACAA                      | 0          | 4                | n.d.            |
| <i>X. autotrophicus</i>  | NC_009720              | AAAGGTTGGTATCGGCAAGTCCACCAC                              | 2          | ATGATGGCCATGTATGCCGGCCAA <b>CAA</b>             | 0          | 2                | 1.73            |
| <i>A. ferrooxidans</i>   | NC_011761              | AAAGGCGG <b>C</b> AT <b>T</b> GGCAAGT <b>CT</b> ACCAC    | 4          | ATGATGGCCATGTATGCCGCCAACAA                      | 0          | 4                | 1.75            |
| <i>B. xenovorans</i>     | NC_007952              | AAAGGTTGGTATCGGCAAGTCCACCAC                              | 2          | ATGATGGCCATGTATGCCGGCCAA <b>CAA</b>             | 0          | 2                | 1.74            |
| <i>G. sulfurreducens</i> | NC_002939              | AAAGGCGG <b>C</b> ATCGGCAAA <b>TCCACCAC</b>              | 2          | ATGATGGCCATGTACGCTGCCAACAA                      | 1          | 3                | 1.67            |
| <i>A. vinelandii</i>     | M20568 <sup>c</sup>    | AAAGGTTGGTATCGGTAAAGTCCACCAC                             | 0          | ATGATGGCCATGTACGCCGCCAACAA                      | 0          | 0                | 1.77            |
| <i>M. capsulatus</i>     | NC_002977              | AAAGGCGG <b>C</b> ATCGGCAAGTCCACCAC                      | 1          | ATGATGGCCATGTATGCCGGCCAA <b>CAA</b>             | 0          | 1                | 1.77            |
| <i>P. stutzeri</i>       | NC_009434              | AAAGGTTGGAA <b>T</b> CGGCAAA <b>TCCACCAC</b>             | 1          | ATGATGGCCATGTATGCCGCCAACAA                      | 0          | 1                | 1.71            |

<sup>a</sup> DNA sequences in the reverse priming site are given in the same sense as in the forward priming site.

<sup>b</sup> Reverse complement to primer niHR, in order to match the sequence alignment.

<sup>c</sup> Sequences of strains that are closely related to the strains used in the analysis.

<sup>e</sup> Available sequence information on *nifH* of *S. azotifigens* was limited and did not cover the entire priming site.

n.d. - no amplification was detected.

Table A2. Variation of the SC method parameters for dilution series.

independently prepared by five researchers (A–E) and run by one researcher in one qPCR assay per primer pair.

| Template            | Target gene primer pair    | Dilution series <sup>a</sup> | Slope  | Intercept | R <sup>2</sup> | n <sup>b</sup> | $E_{ds}$ |
|---------------------|----------------------------|------------------------------|--------|-----------|----------------|----------------|----------|
| <i>B. japonicum</i> | <i>nifH</i><br>nifHF/nifHR | A                            | -3.946 | 36.33     | 0.987          | 11             | 1.76     |
|                     |                            | B                            | -4.106 | 36.81     | 0.988          | 11             | 1.79     |
|                     |                            | C                            | -4.356 | 37.95     | 0.985          | 14             | 1.75     |
|                     |                            | D                            | -4.188 | 37.25     | 0.991          | 13             | 1.76     |
|                     |                            | E                            | -3.970 | 36.22     | 0.981          | 15             | 1.77     |
| <i>P. stutzeri</i>  | <i>nifH</i><br>nifHF/nifHR | A                            | -4.732 | 39.71     | 0.981          | 11             | 1.63     |
|                     |                            | B                            | -4.529 | 39.69     | 0.964          | 8              | 1.66     |
|                     |                            | C                            | -4.852 | 41.06     | 0.940          | 9              | 1.61     |
|                     |                            | D                            | -4.983 | 40.97     | 0.989          | 12             | 1.59     |
|                     |                            | E                            | -5.065 | 40.88     | 0.984          | 12             | 1.58     |
| <i>B. japonicum</i> | 16S rRNA<br>27F/518R       | A                            | -5.000 | 34.98     | 0.987          | 8              | 1.58     |
|                     |                            | B                            | -4.882 | 43.29     | 0.986          | 9              | 1.60     |
|                     |                            | C                            | -5.307 | 45.18     | 0.996          | 9              | 1.54     |
|                     |                            | D                            | -4.835 | 43.28     | 0.996          | 9              | 1.61     |
|                     |                            | E                            | -4.708 | 42.62     | 0.995          | 8              | 1.63     |
| <i>P. stutzeri</i>  | 16S rRNA<br>27F/518R       | A                            | -3.909 | 32.55     | 0.99           | 9              | 1.80     |
|                     |                            | B                            | -3.894 | 32.40     | 0.992          | 10             | 1.81     |
|                     |                            | C                            | -4.077 | 33.28     | 0.987          | 11             | 1.76     |
|                     |                            | D                            | -3.880 | 32.46     | 0.995          | 11             | 1.81     |
|                     |                            | E                            | -3.817 | 32.19     | 0.997          | 12             | 1.83     |

<sup>a</sup> five researchers (A-E) independently prepared dilution series of each template.

<sup>b</sup> number of points in calibration.

Figure A1. Variability of qPCR efficiency estimations by dilution series ( $E_{ds}$ ) and fluorescence increase ( $E_{fi}$ ).  $E_{ds}$  and  $E_{fi}$ , and means of  $E_{ds}$  and  $E_{fi}$  determined on dilution series independently prepared by five researchers (A–E) using the same DNA stock and lab equipment. Error bars indicate the standard deviation. Asterisk indicates significant differences between mean  $E_{ds}$  and mean  $E_{fi}$  by the Mann-Whitney rank sum test ( $p < 0.01$ ).

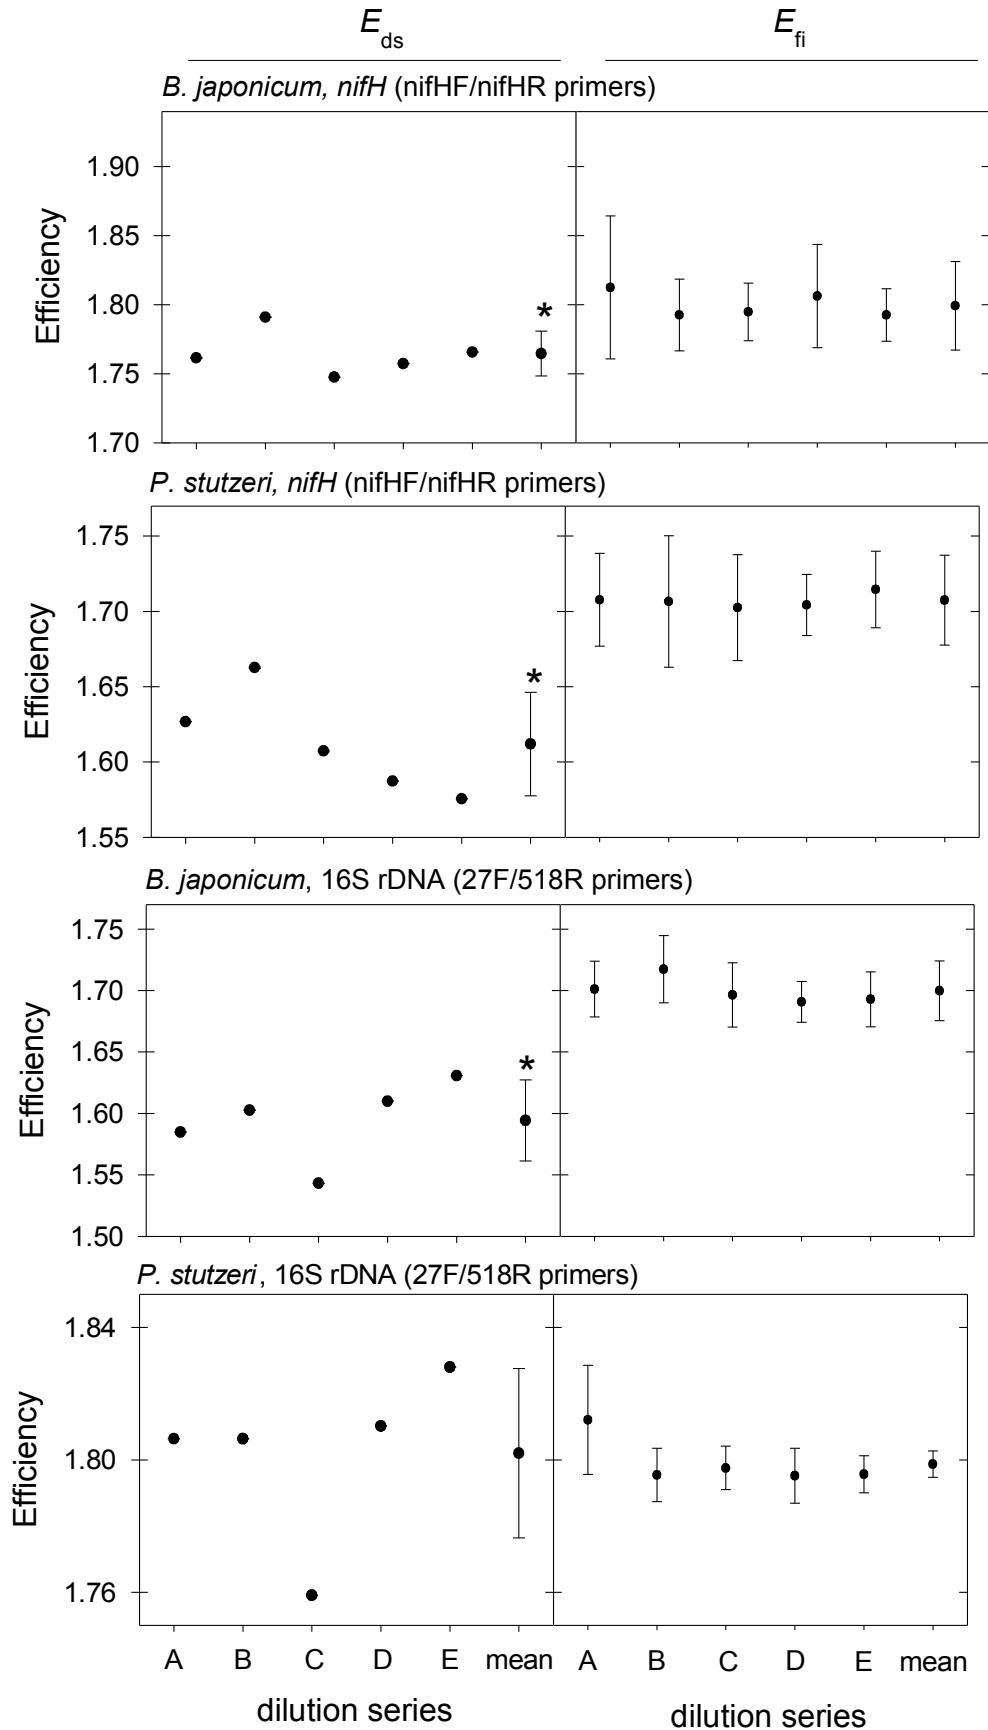

Supplement: supp_78.12.4481_AEM07878-11_supplemental.pdf [file supp_78.12.4481_AEM07878-11_supplemental.pdf]
